# Supplementary material for: Identification of a molecular basis for the juvenile sleep state
Source: eLife journal article supplement (doi:10.7554/elife.52676), 2020-03-23
Supplement: figures [file elife-52676-figures-v2.pdf]

---

## Figures and figure supplements

Identification of a molecular basis for the juvenile sleep state

**Leela Chakravarti Dilley et al**

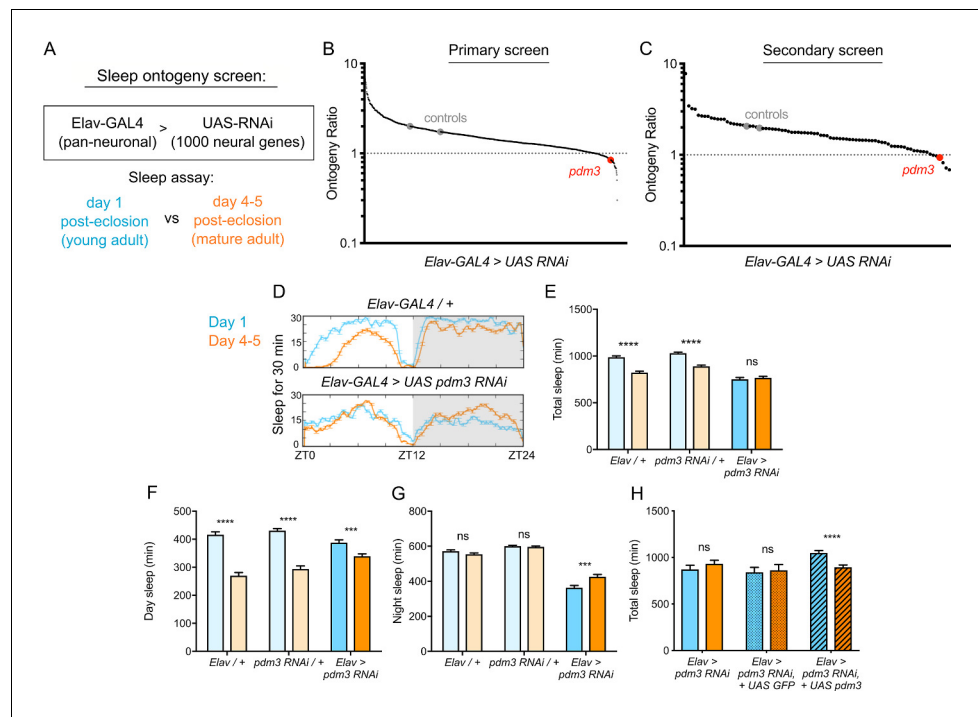

**Figure 1.** *Pdm3* controls sleep ontogeny in *Drosophila*. (A) Ontogeny screen design (B) Primary sleep ontogeny screen. Ontogeny ratio = (min daytime sleep, young) / (min daytime sleep, mature). (C) Secondary screen of primary hits ( $n \geq 8$  flies per genotype/age in B and C). (D) Representative sleep traces of genetic controls (top) and *pdm3* knockdown (bottom). Young flies are shown in blue and mature flies are shown in orange. Comparison of (E) total sleep, (F) day sleep and (G) night sleep in *pdm3* RNAi and controls at day 1 versus day 4–5 ( $n = 97, 106, 119, 95, 140, 145$  left to right in E–G). (H) Total sleep time with re-expression of PDM3 (right) versus a control UAS-GFP construct (middle) ( $n = 24, 24, 19, 16, 30, 31$  left to right). Graphs in this figure and all others unless otherwise specified are presented as means  $\pm$  SEM. \*\*\*\* $p < 0.0001$ , \*\*\* $p < 0.001$ , \*\* $p < 0.01$ , \* $p < 0.05$ ; multiple Student's *t* tests with Holm-Sidak correction,  $\alpha = 0.05$  (E–H).

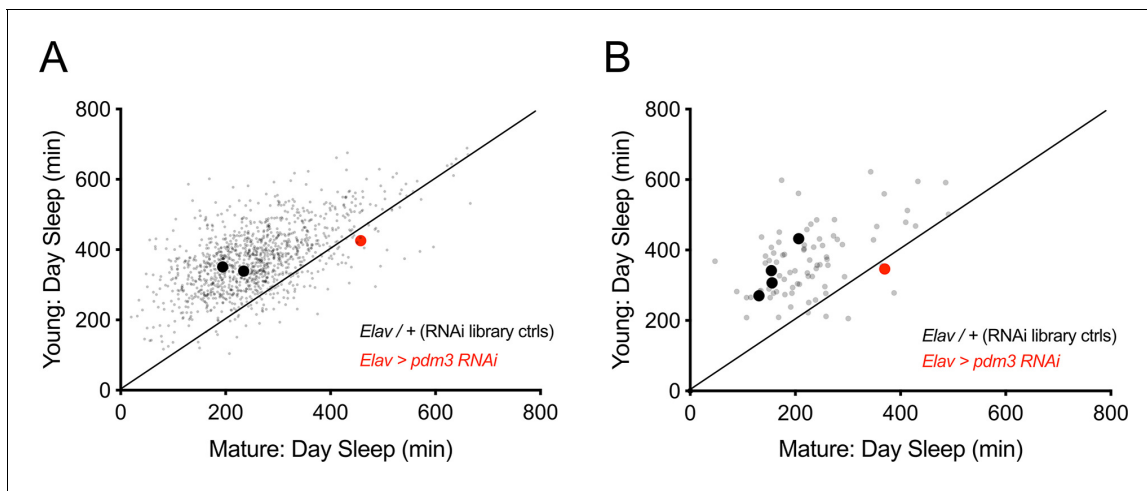

**Figure 1—figure supplement 1.** Young versus mature sleep amounts in primary and secondary sleep ontogeny screens. Daytime sleep in young flies is plotted against daytime sleep in mature flies of the same genotype. Genotypes that fall below or along the plotted identity line (day sleep in young = day sleep in mature) have abnormal sleep ontogeny. (A) Primary sleep ontogeny screen. (B) Secondary screen of primary hits ( $n \geq 8$  flies per genotype/age in A and B).

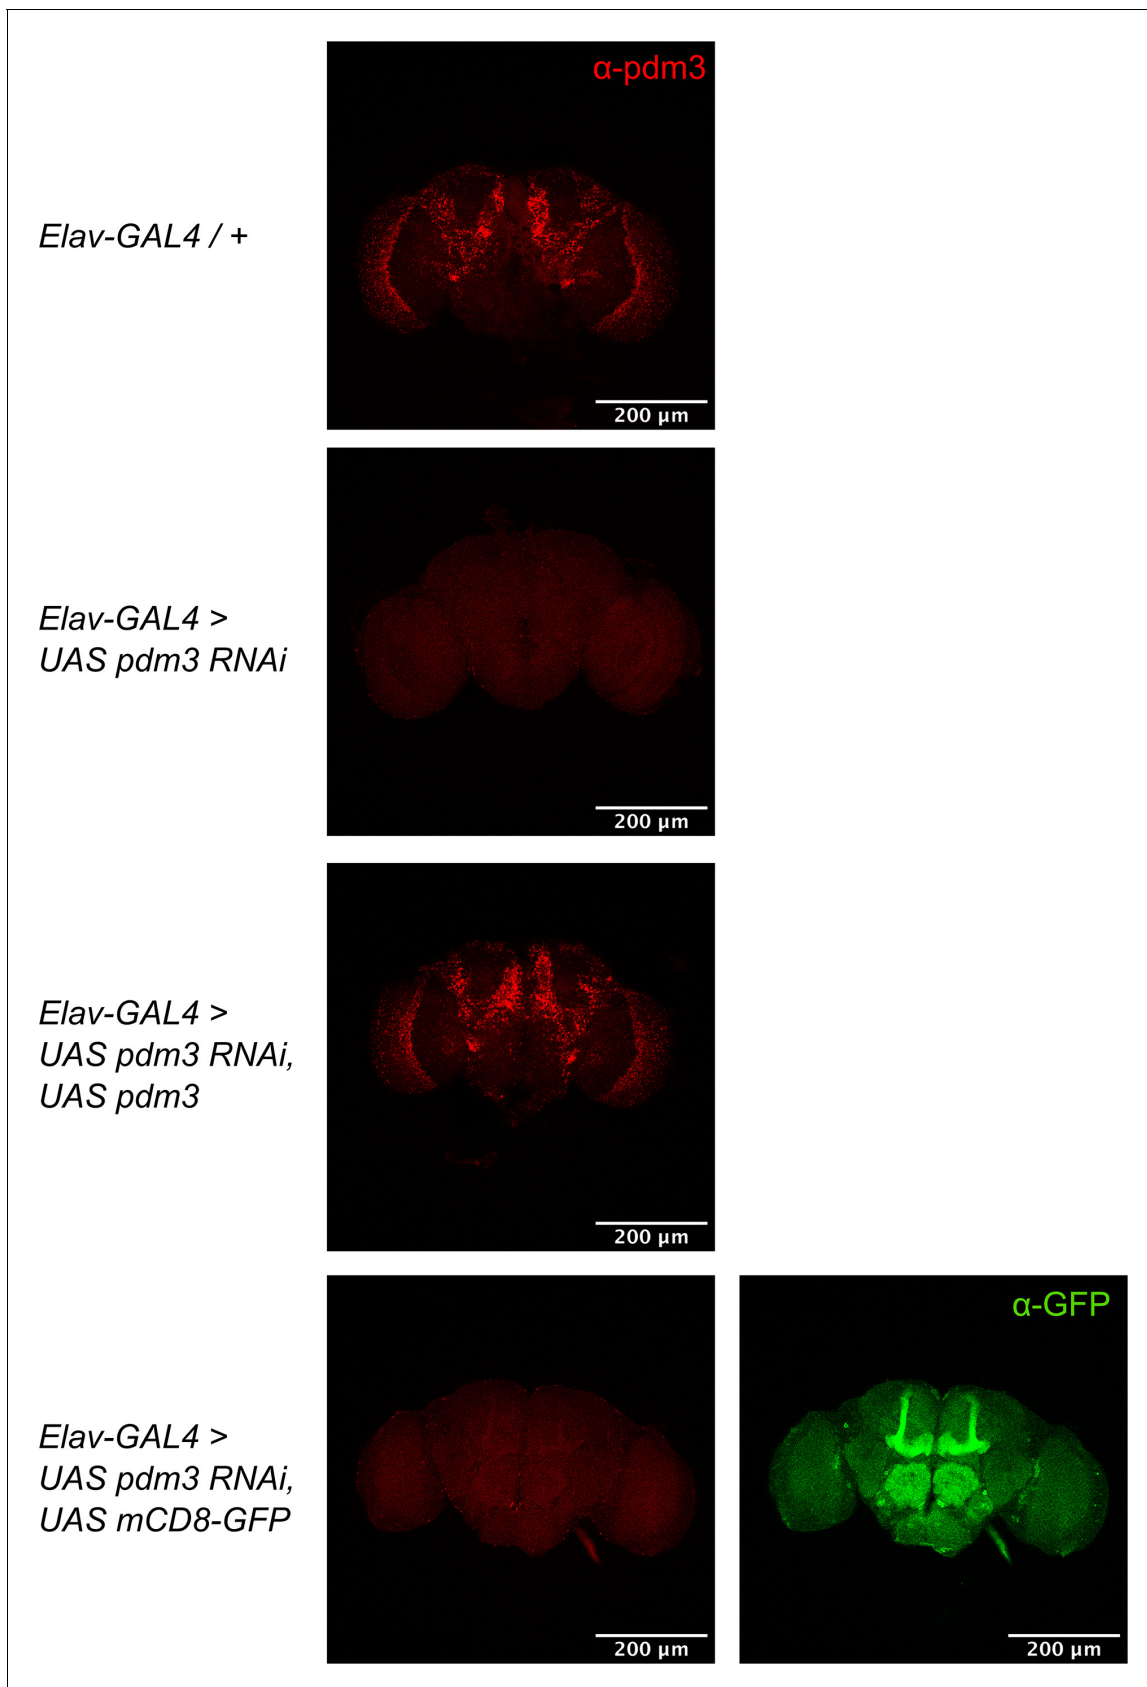

**Figure 1—figure supplement 2.** Confirmation of *pdm3* knockdown. Staining with anti-PDM3 antibody to confirm *pdm3* knockdown and rescue. Co-expression of a control construct, *UAS-GFP*, in the setting of *pdm3* RNAi does not affect PDM3 protein levels in the brain.



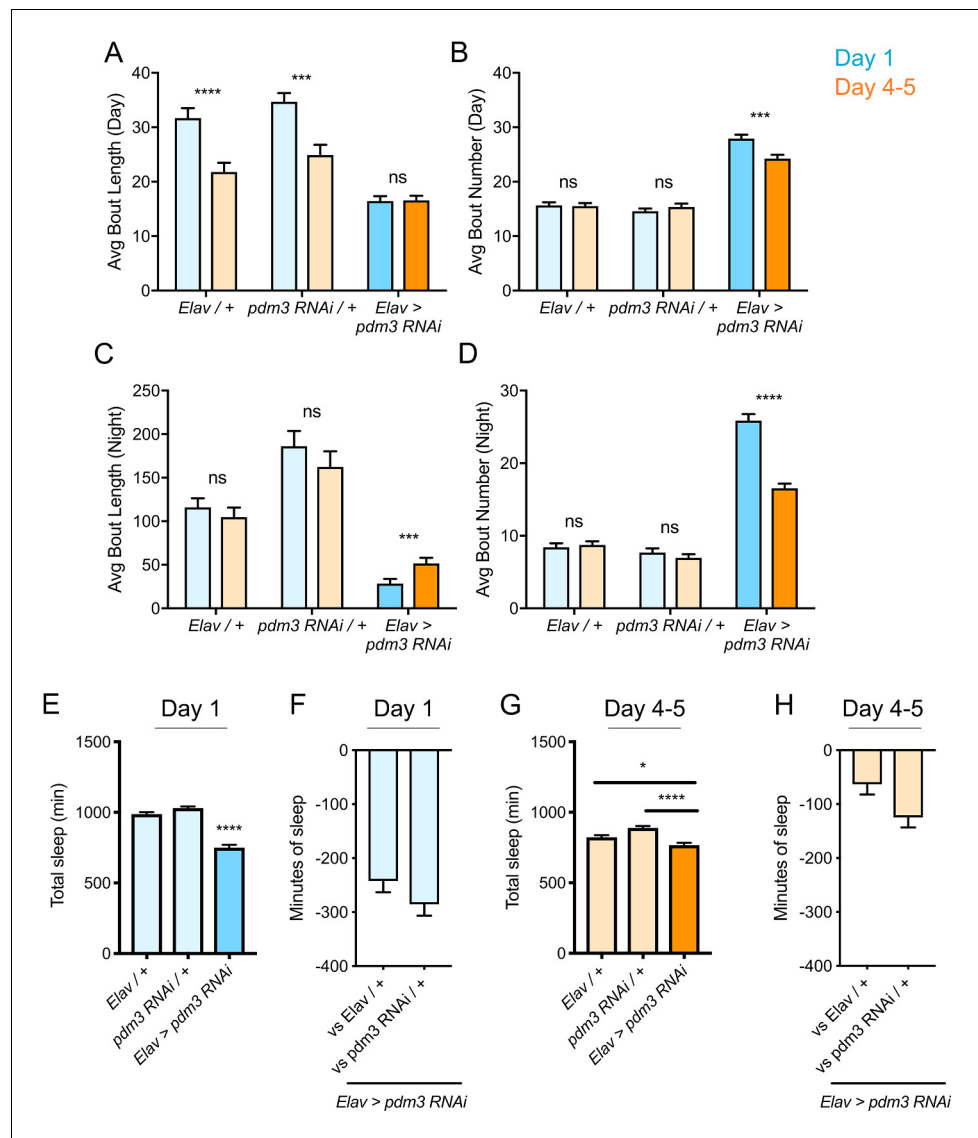

**Figure 2.** Effects of *pdm3* knockdown on sleep architecture. (A) Day sleep average bout length and (B) day sleep average bout number in *pdm3* RNAi and controls at day 1 (blue) versus day 4–5 (orange). (C) Night bout length and (D) night average bout number in *pdm3* RNAi and controls ( $n = 97, 106, 119, 95, 140, 145$  left to right in A–D). (E) Total sleep time at day 1, *pdm3* RNAi versus controls ( $n = 97, 119, 140$  left to right). (F) Minutes of sleep lost in *Elav*-GAL4 >UAS *pdm3* RNAi at day one compared to each genetic control. (G) Total sleep time at day 4–5, *pdm3* RNAi versus controls ( $n = 106, 95, 145$  left to right). (H) Minutes of sleep lost in *Elav*-GAL4 >UAS *pdm3* RNAi at day 4–5 compared to each genetic control. \*\*\*\* $p < 0.0001$ , \*\*\* $p < 0.001$ , \*\* $p < 0.01$ , \* $p < 0.05$ ; multiple Student's *t* tests with Holm-Sidak correction,  $\alpha = 0.05$  (A–D); ANOVA with Tukey's test (E–H).

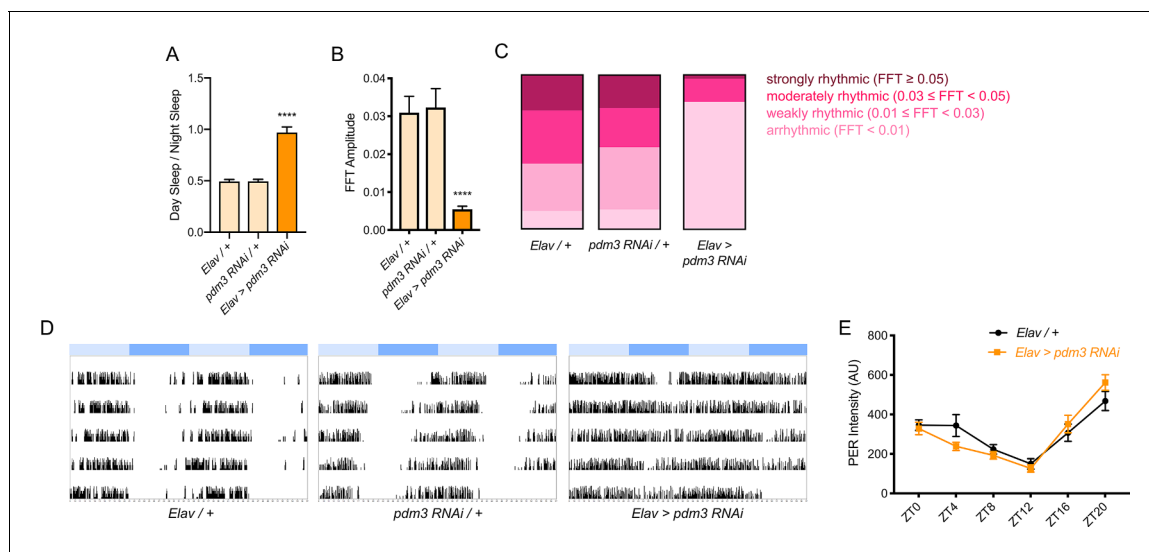

**Figure 2—figure supplement 1.** *Pdm3* knockdown disrupts behavioral rhythms but leaves molecular clock intact. (A) Quantification of sleep redistribution as ratio of day/night sleep in mature flies ( $n = 106, 95, 145$  left to right). (B) FFT amplitude of free-running rhythms in constant darkness (mature flies) ( $n = 29, 25, 28$  left to right). (C) Classification of rhythm strength based on FFT value. (D) Representative actograms for each genotype in constant darkness. (E) Intensity of PER protein levels in sLN<sub>v</sub> core clock cells across the circadian day in *pdm3* knockdown and controls ( $n = 7-9$  brains per condition).

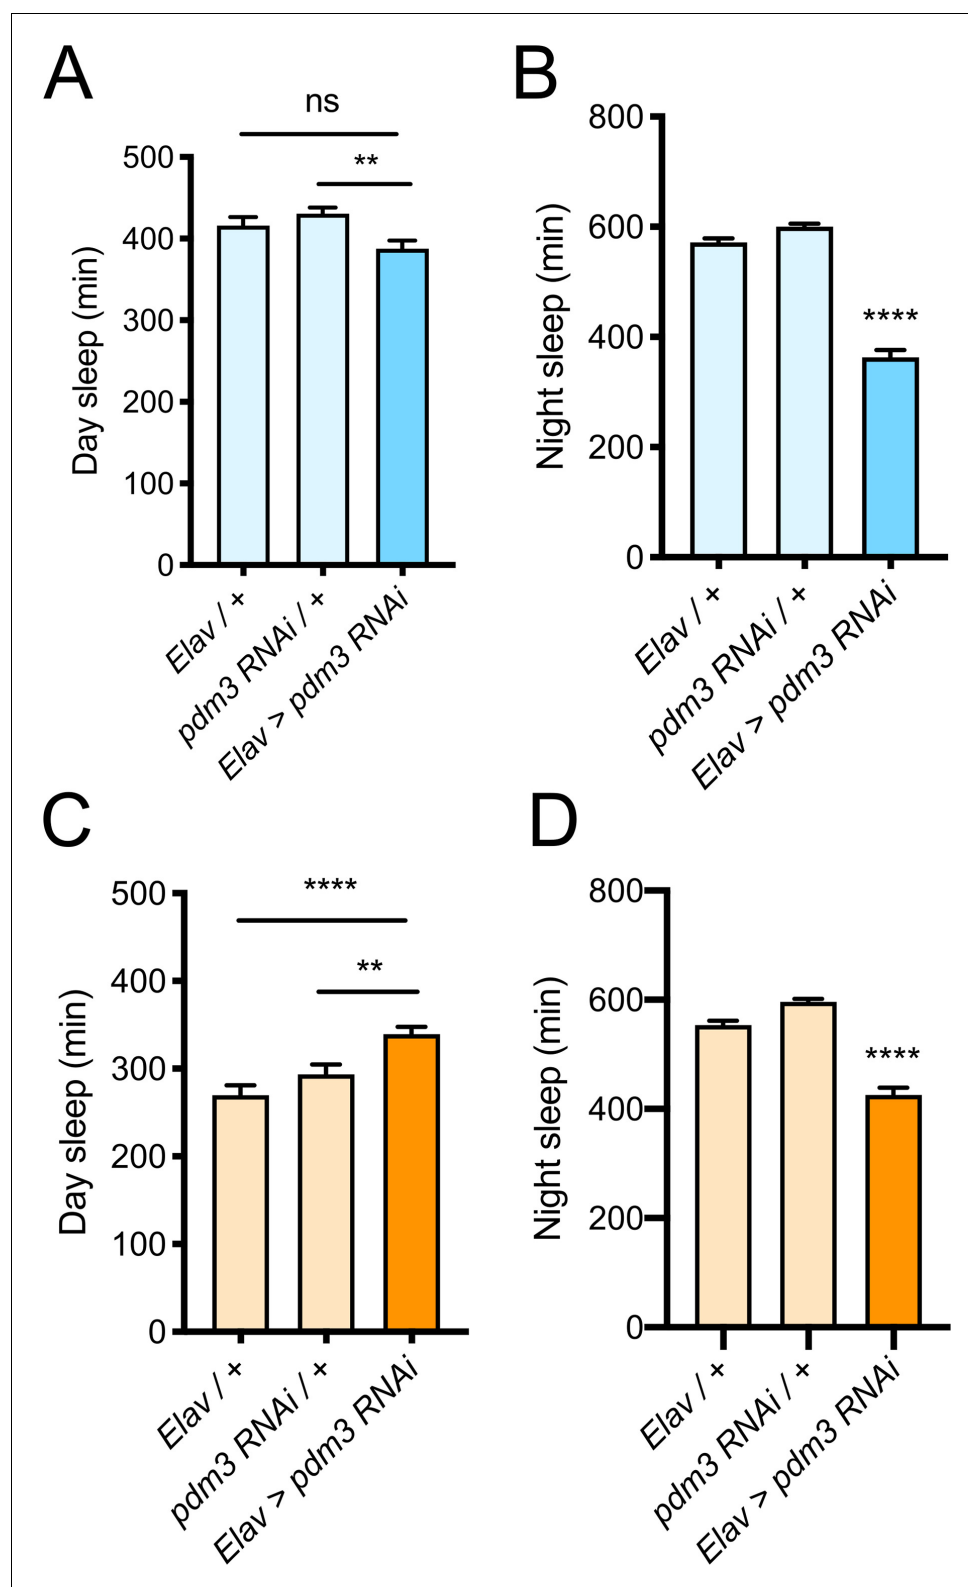

**Figure 2—figure supplement 2.** Comparison of sleep duration within age groups with *pdm3* knockdown. Day (A) and night (B) sleep duration at day 1, *pdm3* RNAi versus controls (n = 97, 119, 140 left to right). Day (C) and night (D) sleep duration at day 4–5, *pdm3* RNAi versus controls (n = 106, 95, 145 left to right) \*\*\*\*p<0.0001, \*\*\*p<0.001, \*\*p<0.01, \*p<0.05; ANOVA with Tukey's test (A–D).

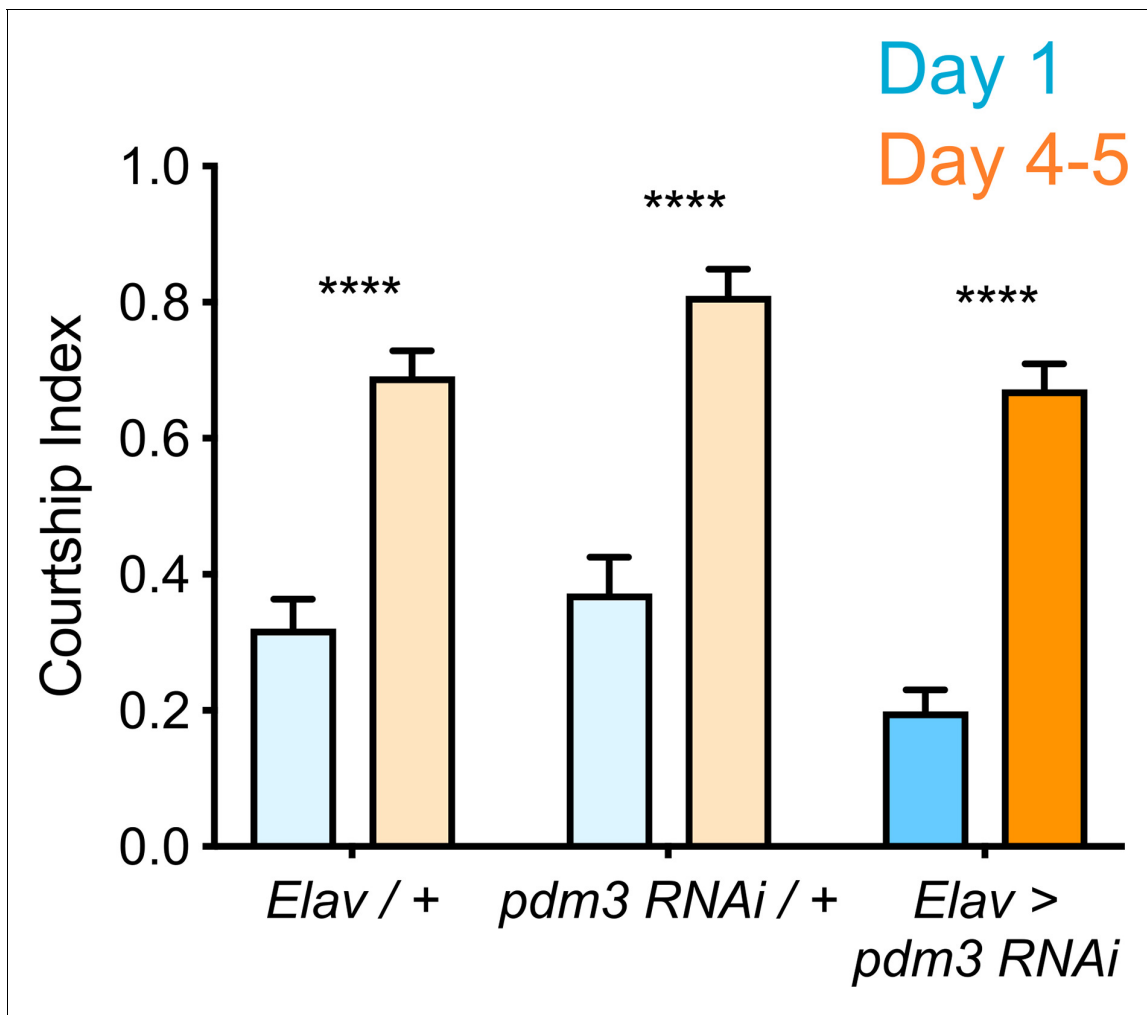

**Figure 2—figure supplement 3.** Maturation of courtship behaviors are unaffected by *pdm3* knockdown. Courtship Index (time spent engaged in courtship behavior/total assay time) at day 1 versus day 4–5 in controls and *pdm3* RNAi (darker bars, right) ( $n = 28, 27, 21, 28, 23, 28$  left to right). \*\*\*\* $p < 0.0001$ ; multiple Student's  $t$  tests with Holm-Sidak correction,  $\alpha = 0.05$ .

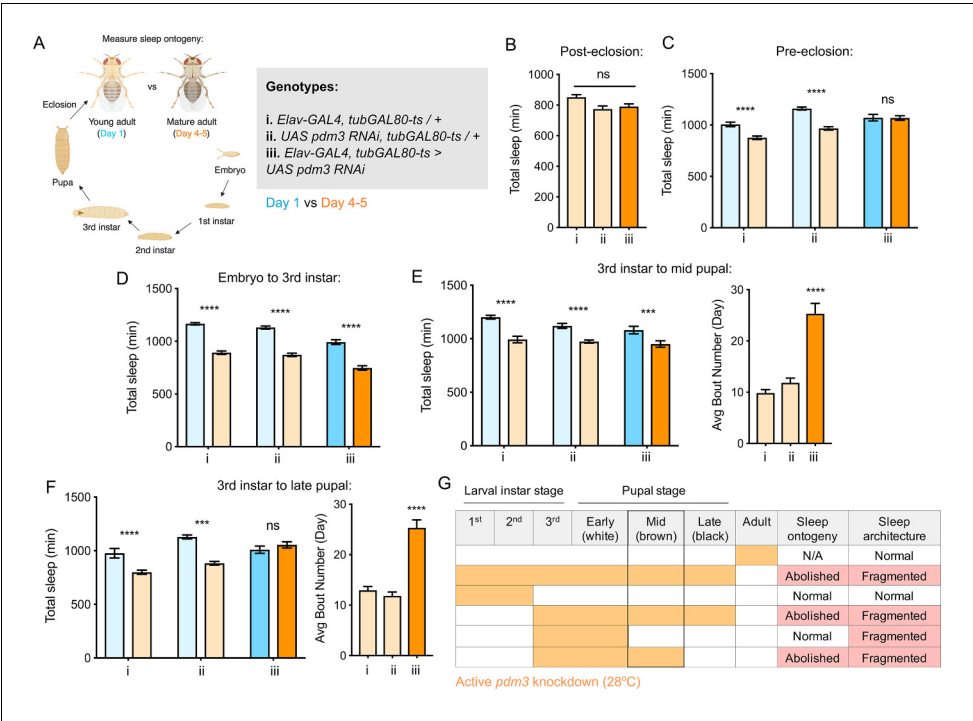

**Figure 3.** *Pdm3* acts during mid-pupal development to control sleep ontogeny. **(A)** *Drosophila* life cycle. **(B)** Total sleep in mature adults with *pdm3* knockdown post-eclosion and genetic controls (n = 50, 60, 70 left to right). **(C)** Total sleep with pre-eclosion *pdm3* knockdown in day 1 (blue) versus day 4–5 (orange) (n = 44, 42, 38, 42, 35, 50 left to right). **(D)** Total sleep with *pdm3* knockdown from embryo to the 3<sup>rd</sup> instar larval stage (n = 76, 79, 82, 64, 73, 99 left to right). **(E)** Total sleep (left) and day sleep bout number (right) with *pdm3* knockdown from the 3<sup>rd</sup> instar larval stage up to the mid pupal stage (n = 33, 32, 32, 31, 32, 32 left to right). **(F)** Total sleep (left) and day sleep bout number (right) with *pdm3* knockdown from the 3<sup>rd</sup> instar larval stage to the late pupal stage (n = 30, 32, 32, 32, 32, 31 left to right). **(G)** Summary of temporal mapping and dissociation of sleep ontogeny from sleep architecture \*\*\*\*p<0.0001, \*\*\*p<0.001, \*\*p<0.01, \*p<0.05; multiple Student's *t* tests with Holm-Sidak correction, alpha = 0.05 (C, D, E/F left); ANOVA with Tukey's test (B, E/F right).

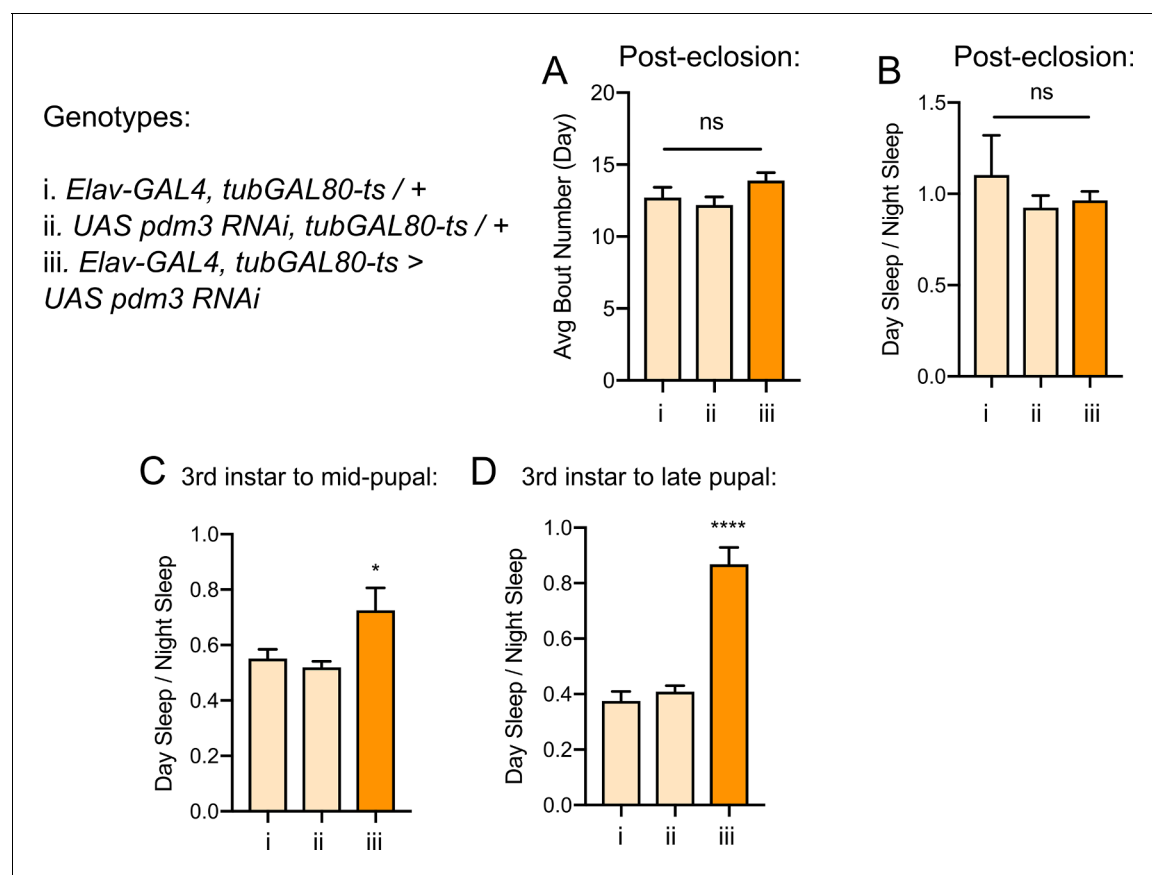

**Figure 3—figure supplement 1.** Sleep architecture with temporally-restricted *pdm3* knockdown. (A) Day average sleep bout number with *pdm3* knockdown post-eclosion. (B) Ratio of day/night sleep distribution with *pdm3* knockdown post-eclosion ( $n = 50, 60, 70$  left to right in A,B). Ratios of day-night sleep distribution with *pdm3* knockdown from (C) 3<sup>rd</sup> instar larval stage to mid-pupal stage and (D) 3<sup>rd</sup> instar larval stage to late pupal stage (C:  $n = 32, 31, 32$  left to right, D:  $n = 32, 32, 31$  left to right). \*\*\*\* $p < 0.0001$ , \* $p < 0.05$ ; ANOVA with Tukey's test (A–D).

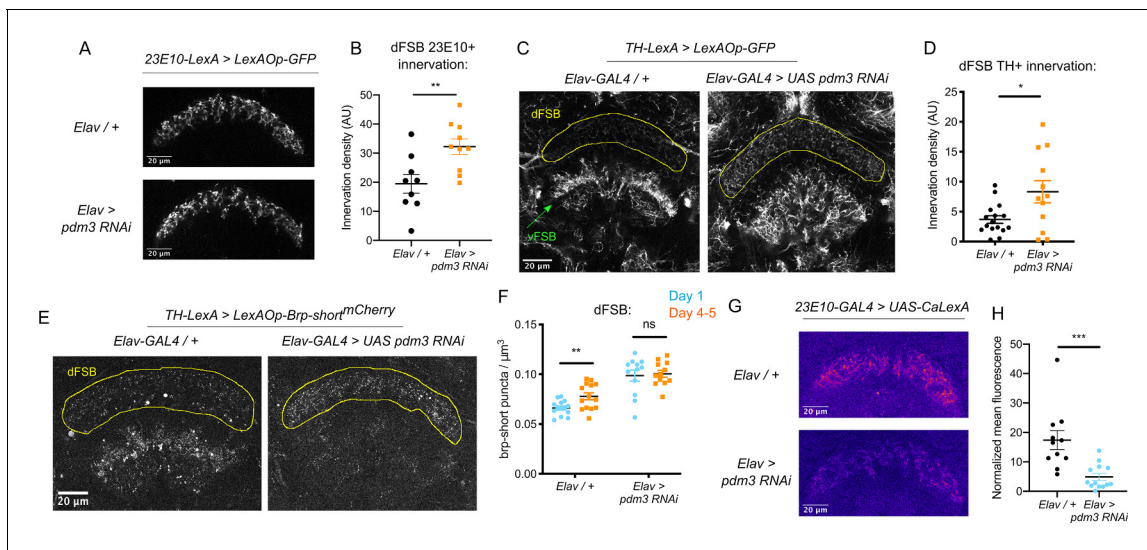

**Figure 4.** Loss of PDM3 increases inhibitory DA input to the sleep-promoting dFSB. (A) Projections of 23E10+ dFSB neurons in controls (top) and *pdm3* RNAi (bottom). (B) Innervation density of 23E10+ neurites in the adult dFSB (n = 9 controls, 10 *pdm3* RNAi). (C) TH+ projections to the FSB in controls (left) and *pdm3* RNAi (right). (D) Innervation density of TH+ neurites in the adult dFSB (n = 16 controls, 12 *pdm3* RNAi). (E) Labeling of TH+ pre-synaptic sites in the FSB with Brp-short<sup>mCherry</sup>. (F) TH+ synapse density in the dFSB in controls (left) and *pdm3* RNAi (right) at day 1 and day 4–5 (n = 14, 14, 12, 12 left to right). (G) Pseudocolored CaLexA signal in 23E10+ neurons in day one controls (top) versus *pdm3* RNAi (bottom), quantified in (H) (n = 11 controls, 13 *pdm3* RNAi). \*\*\*\*p<0.0001, \*\*\*p<0.001, \*\*p<0.01, \*p<0.05; unpaired two-tailed Student's t test plus Welch's correction (B,D,H), multiple Student's t tests with Holm-Sidak correction, alpha = 0.05 (F).

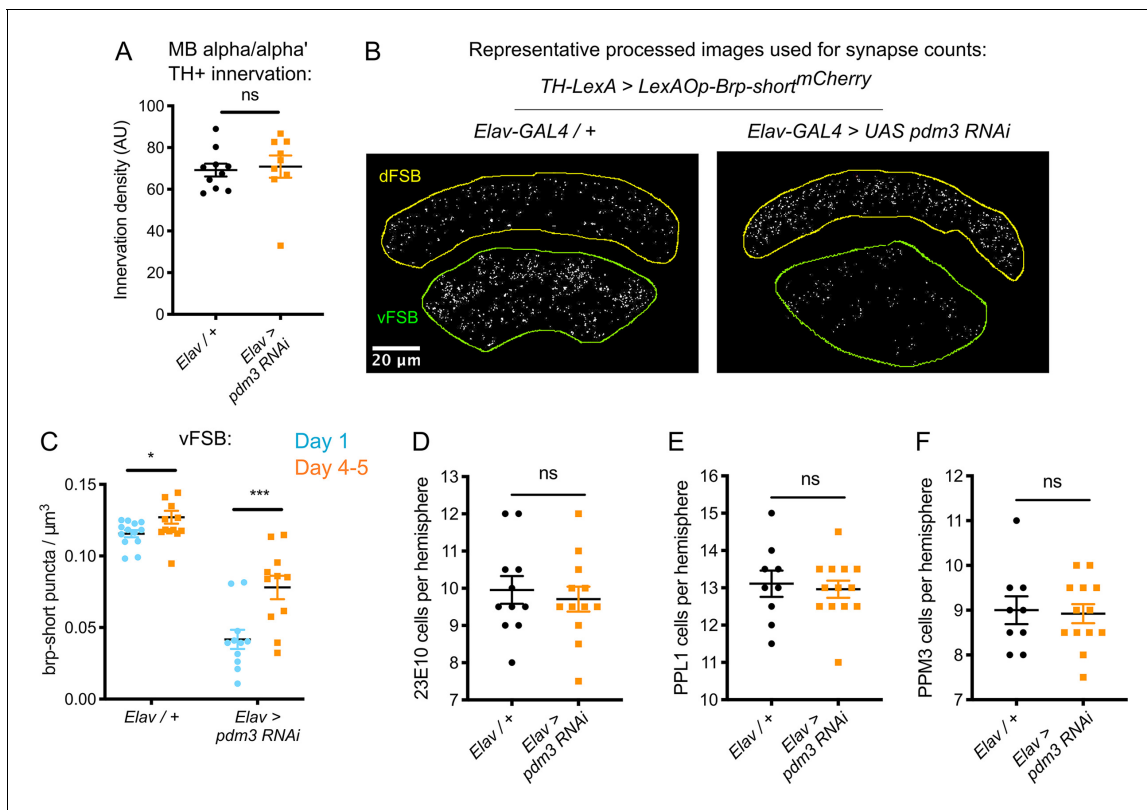

**Figure 4—figure supplement 1.** Additional characterization of dopaminergic innervation and cell counts in the setting of *pdm3* knockdown. (A) TH+ innervation in the mushroom body (MB) ( $n = 10$  controls, nine *pdm3* RNAi). (B) Representative processed images used for 3D counting of Brp-short<sup>mCherry</sup> synaptic puncta. (C) TH+ synapse density in the vFSB at day 1 versus day 4–5 in *pdm3* RNAi and controls ( $n = 14, 14, 12, 12$  left to right). (D–F) Numbers of 23E10+ (D), TH+ PPL1 (E) and TH+ PPM3 (F) cells per hemisphere ( $n = 11$  controls, 12 *pdm3* RNAi in D,  $n = 9$  controls, 13 *pdm3* RNAi in E,F). \*\*\*\* $p < 0.0001$ , \*\*\* $p < 0.001$ , \*\* $p < 0.01$ , \* $p < 0.05$ ; unpaired two-tailed Student's *t* test plus Welch's correction (A,D–F), multiple Student's *t* tests with Holm-Sidak correction,  $\alpha = 0.05$  (C).



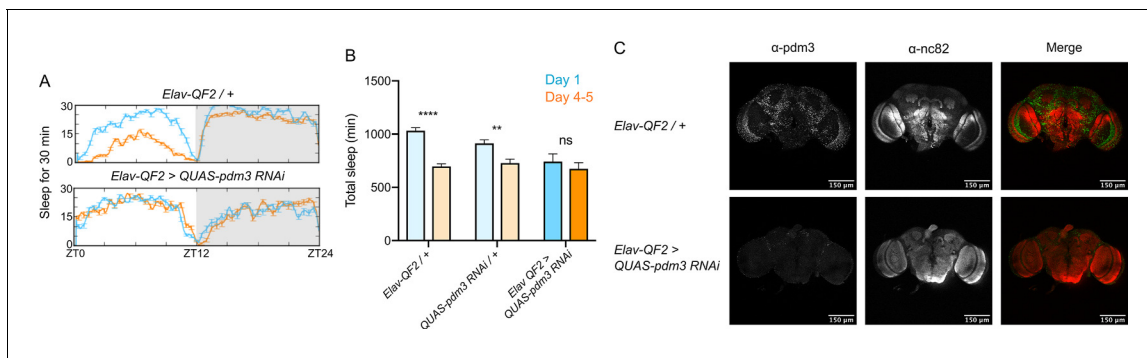

**Figure 4—figure supplement 2.** Confirmation of QF2-QUAS system for panneuronal *pdm3* knockdown. (A) Representative sleep trace of controls (top) and *pdm3* knockdown using the QF2-QUAS system. (B) Total sleep time with *pdm3* RNAi and controls in the QF2-QUAS system at day 1 versus day 4–5 ( $n = 16, 22, 15, 11, 16, 24$  left to right). (C) Anti-PDM3 staining to confirm *pdm3* knockdown with *Elav-QF2 >QUAS-pdm3 RNAi*. \*\*\*\* $p < 0.0001$ , \*\* $p < 0.01$ ; multiple Student's  $t$  tests with Holm-Sidak correction,  $\alpha = 0.05$  (B).

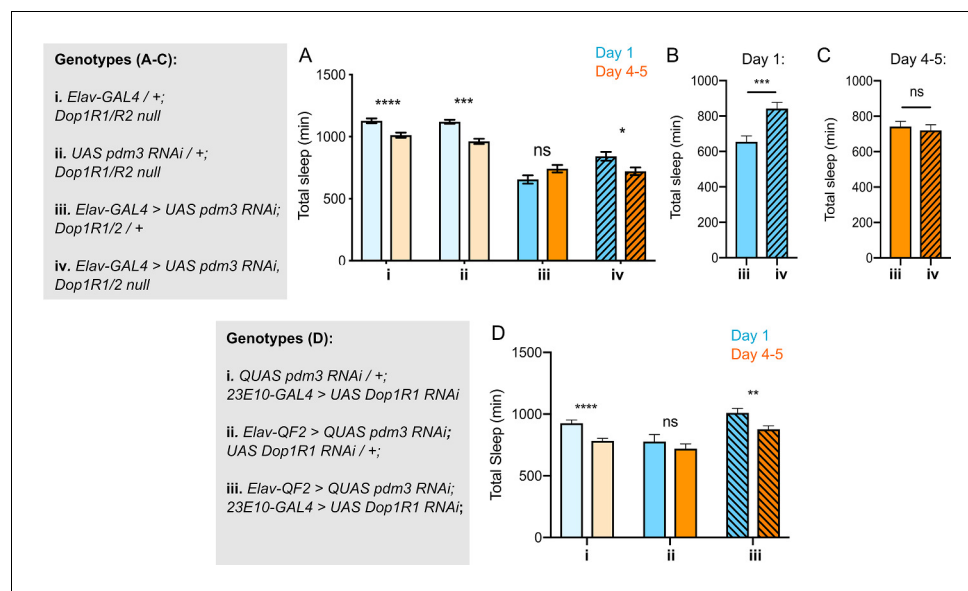

**Figure 5.** Reducing Dop1R1 signaling restores normal sleep ontogenetic change. (A) *Dop1R1/R2*<sup>-/-</sup> with *pdm3* RNAi and controls (n = 55, 92, 72, 96, 58, 97, 45, 75 left to right). Comparison of total sleep amount in *Elav-pdm3* RNAi with and without *Dop1R1/R2* null mutation in day 1 (B) and day 4–5 (C). (D) *Dop1R1* knockdown in 23E10+ neurons in the setting of pan-neuronal *pdm3* RNAi and controls (n = 39, 46, 17, 25, 33, 50 left to right). \*\*\*\*p<0.0001, \*\*\*p<0.001, \*\*p<0.01, \*p<0.05; multiple Student's t tests with Holm-Sidak correction, alpha = 0.05 (A, D), unpaired two-tailed Student's t test plus Welch's correction (B,C).

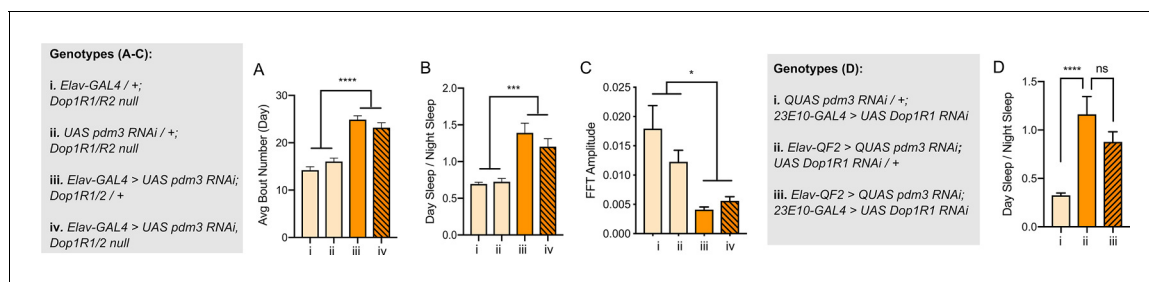

**Figure 5—figure supplement 1.** Reducing dopaminergic signaling does not rescue aberrant sleep architecture. (A–C) *Dop1R1/2* null mutation with *pdm3* RNAi: (A) day sleep bout number, (B) ratio of day/night sleep, and (C) FFT amplitude are shown in mature flies (n = 92, 96, 97, 75 left to right in A–C). (D) *23E10-GAL4 > Dop1 R1 RNAi* in the setting of pan-neuronal *pdm3* RNAi: ratio of day/night sleep (n = 52, 33, 51 left to right) \*\*\*\*p<0.0001, \*\*\*p<0.001, \*p<0.05; ANOVA with Tukey’s test (A–D).

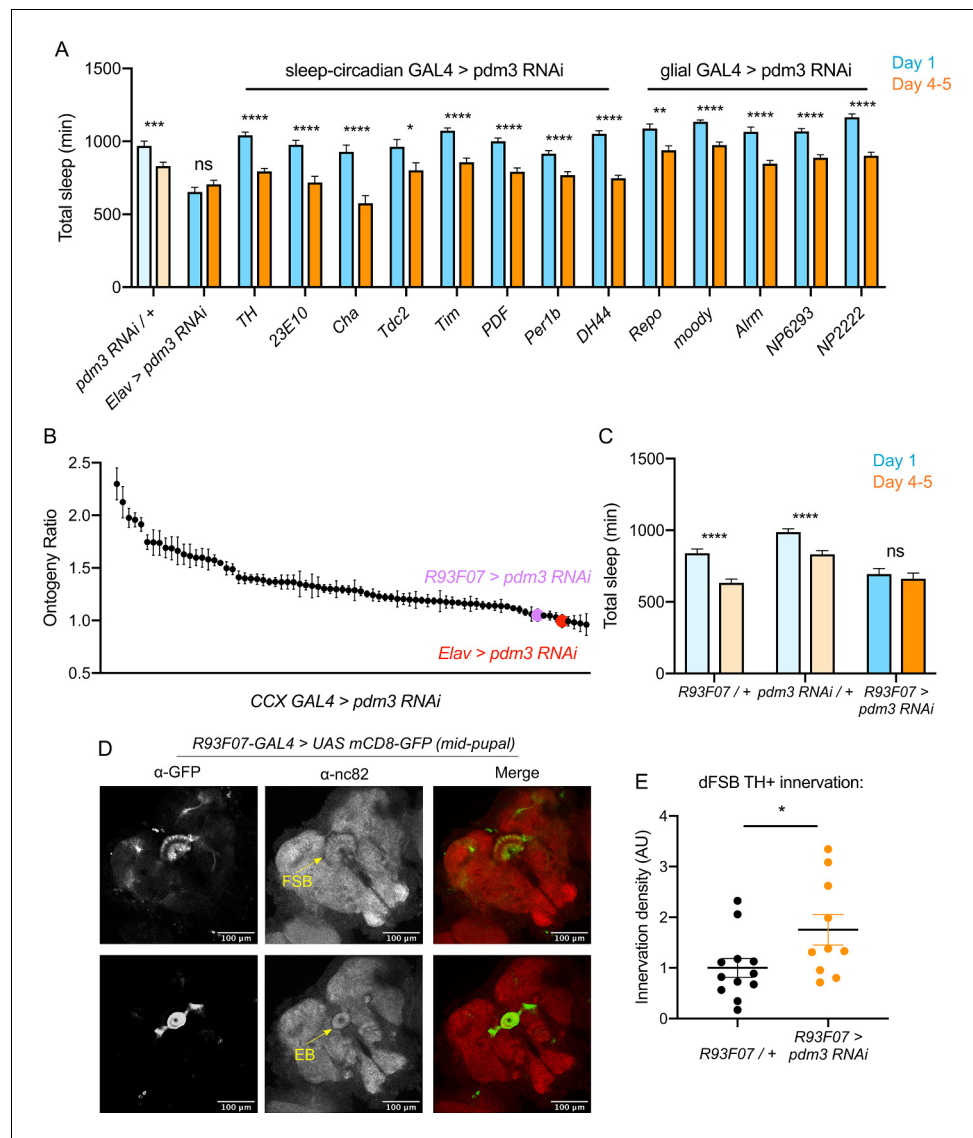

**Figure 6.** Pdm3 acts in R93F07+ CCX target cells to control sleep ontogeny. (A) Total sleep time: *pdm3* knockdown with spatially restricted GAL4 drivers with expression in sleep/circadian circuitry or glial expression ( $n \geq 8$  per genotype/age). (B) Spatial mapping screen of FlyLight GAL4 lines with adult CCX expression patterns ( $n \geq 8$  per genotype/age). (C) Total sleep time in *R93F07-GAL4 > UAS pdm3 RNAi* versus controls ( $n = 41, 32, 40, 40, 40$  left to right). (D) At the mid-pupal stage, *R93F07-GAL4* is expressed in the FSB (top) as well as the ellipsoid body (EB, bottom). (E) Innervation density of TH+ neurites in the adult dFSB (labeled by TH-LexA > LexAOp GFP) with *R93F07-GAL4* driving *pdm3 RNAi* ( $n = 12$  controls, 10 *pdm3 RNAi*). \*\*\*\* $p < 0.0001$ , \*\*\* $p < 0.001$ , \*\* $p < 0.01$ , \* $p < 0.05$ ; multiple Student's *t* tests with Holm-Sidak correction,  $\alpha = 0.05$  (A, C), unpaired two-tailed Student's *t* test plus Welch's correction (E).

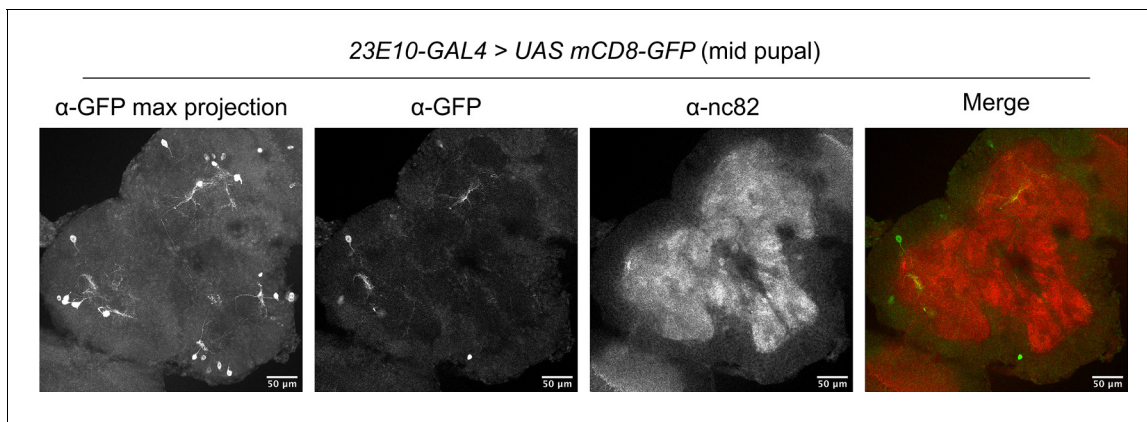

**Figure 6—figure supplement 1.** Expression pattern of *23E10-GAL4* in the mid-pupal brain.

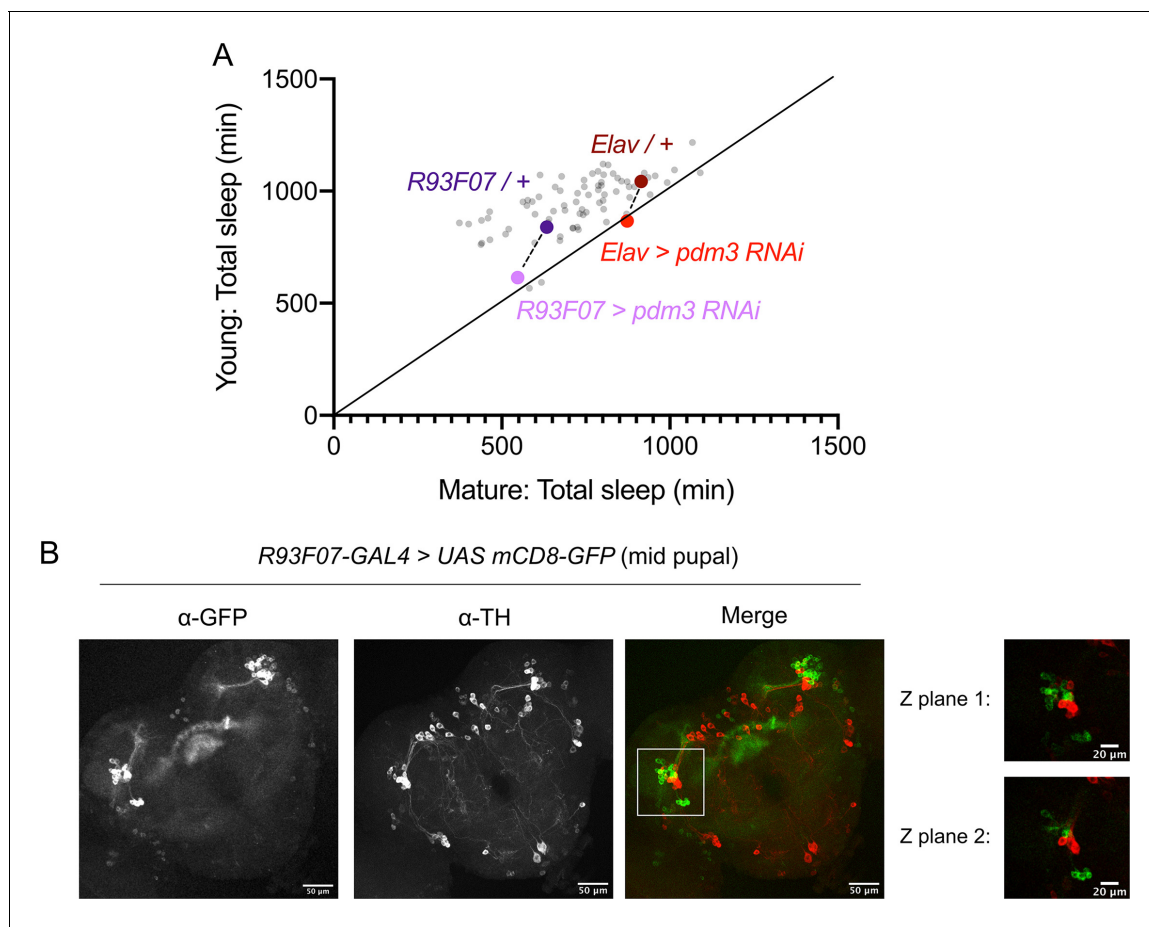

**Figure 6—figure supplement 2.** Sleep amounts from spatial mapping screen identifying R93F07+ cells. (A) Spatial mapping screen of FlyLight CCX-expressing GAL74 lines, plotted as total sleep time in young versus mature flies of each genotype ( $n \geq 8$  per genotype/age). Compared to genetic controls (darker dots), *Elav* or *R93F07 GAL4 > pdm3 RNAi* (lighter dots) results in young and mature flies having the same amount of sleep. Relationship between genetic controls and *pdm3 RNAi* is shown by the dotted lines. Co-labeling of TH+ neurons (labeled by anti-TH) and R93F07+ neurons (labeled by anti-GFP). (B) R93F07+ cells are not dopaminergic. While the merged Z-stack shows some apparent overlap in TH+ and R93F07-GFP signal, this stems from overlap of Z planes rather than true co-labeling.

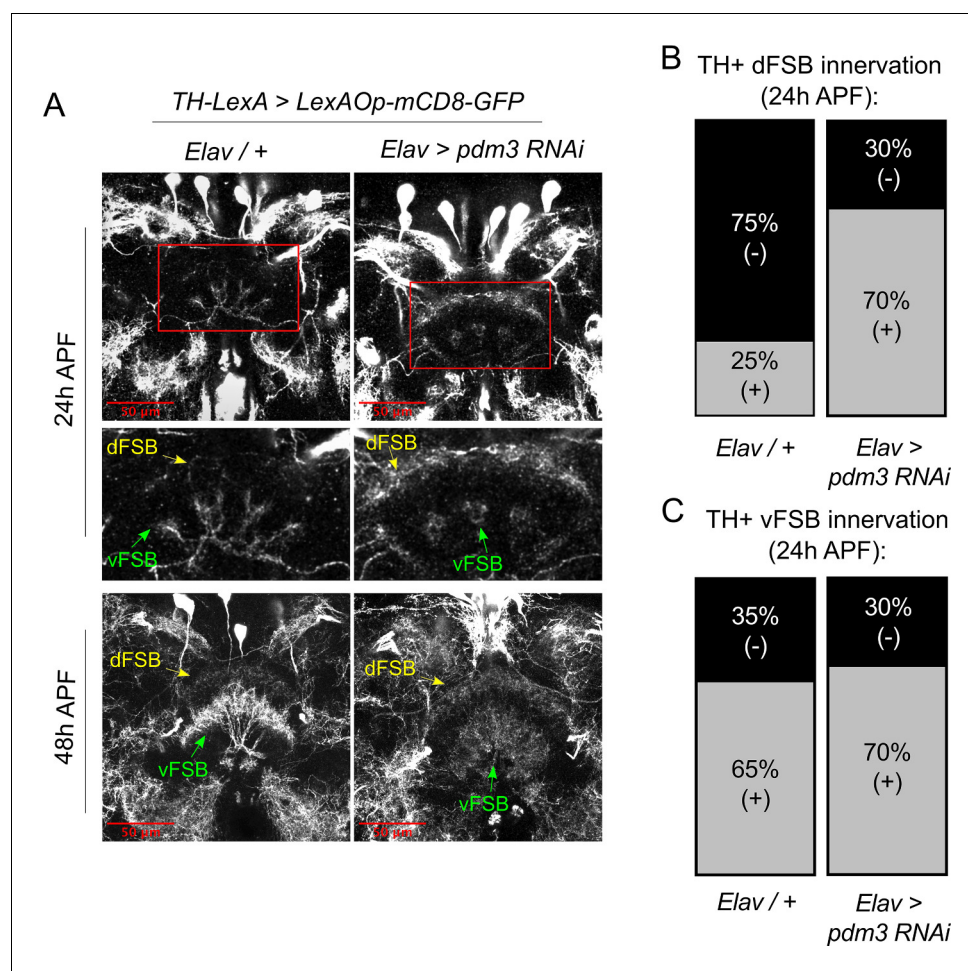

**Figure 7.** *Pdm3* controls TH+ dFSB innervation during pupation. (A) TH+ innervation in the FSB at 24 hr after puparium formation (APF) (top) and 48 hr APF (bottom). (B,C) Percentage of brains with TH+ innervation in the dFSB (B) or vFSB (C) at 24 hr APF (gray = positive for innervation, black = negative; n = 10 controls, 10 *pdm3* RNAi).

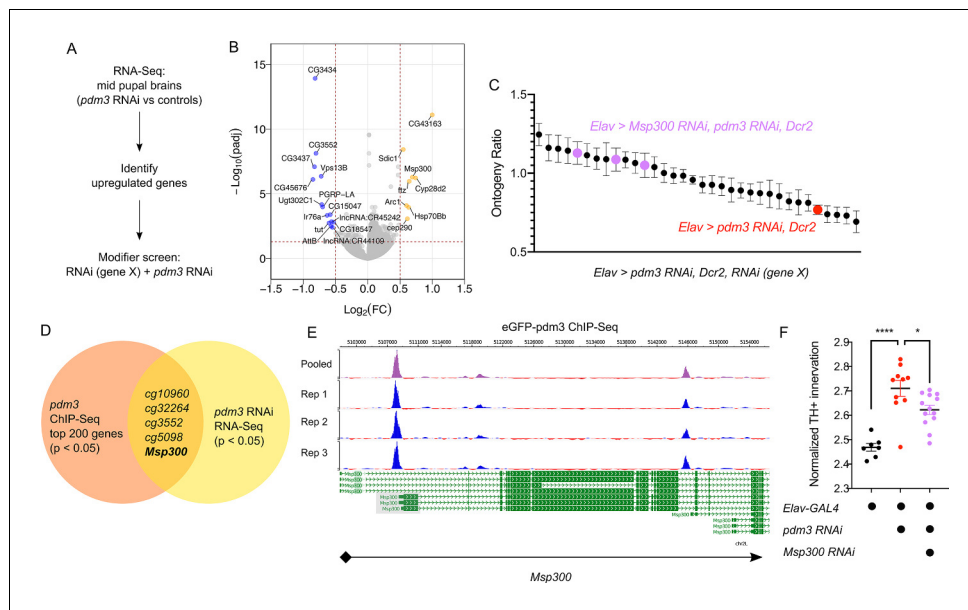

**Figure 8.** *Pdm3* controls expression of the synaptic gene *Msp300* to regulate sleep ontogeny. (A) Scheme of RNA-Seq and subsequent modifier screen. (B) Volcano plot of RNA-Seq data highlighting significant changes in gene expression with *pdm3* knockdown compared to controls in mid-pupal brains. Labeled genes have  $-\log_{10}(\text{padj}) > 1.3$  and absolute value of  $\log_2(\text{Fold Change}) > 0.5$ . Yellow = increased expression, blue = decreased expression upon *pdm3* knockdown ( $n = 4$  biological replicates per genotype, 40 brains per replicate for RNA-Seq). (C) Modifier screen with co-expression of RNAi targeting upregulated genes from RNA-Seq alongside *pdm3* RNAi ( $n \geq 16$  per genotype/age). (D) Overlap of hits from RNA-Seq and *pdm3* ENCODE ChIP-Seq experiments. (E) Control-normalized peaks of PDM3 binding within the *Msp300* gene. The strongest binding peak occurs upstream of the first exon in the RD, RL and RB transcript isoforms (shaded gray box). (F) Quantification of TH+ staining in the dFSB with *Msp300* RNAi and *pdm3* RNAi ( $n = 7, 10, 13$  left to right). RNA-Seq statistical analysis is detailed in Materials and methods. \*\*\*\* $p < 0.0001$ , \* $p < 0.05$ ; ANOVA with Tukey's test (F).



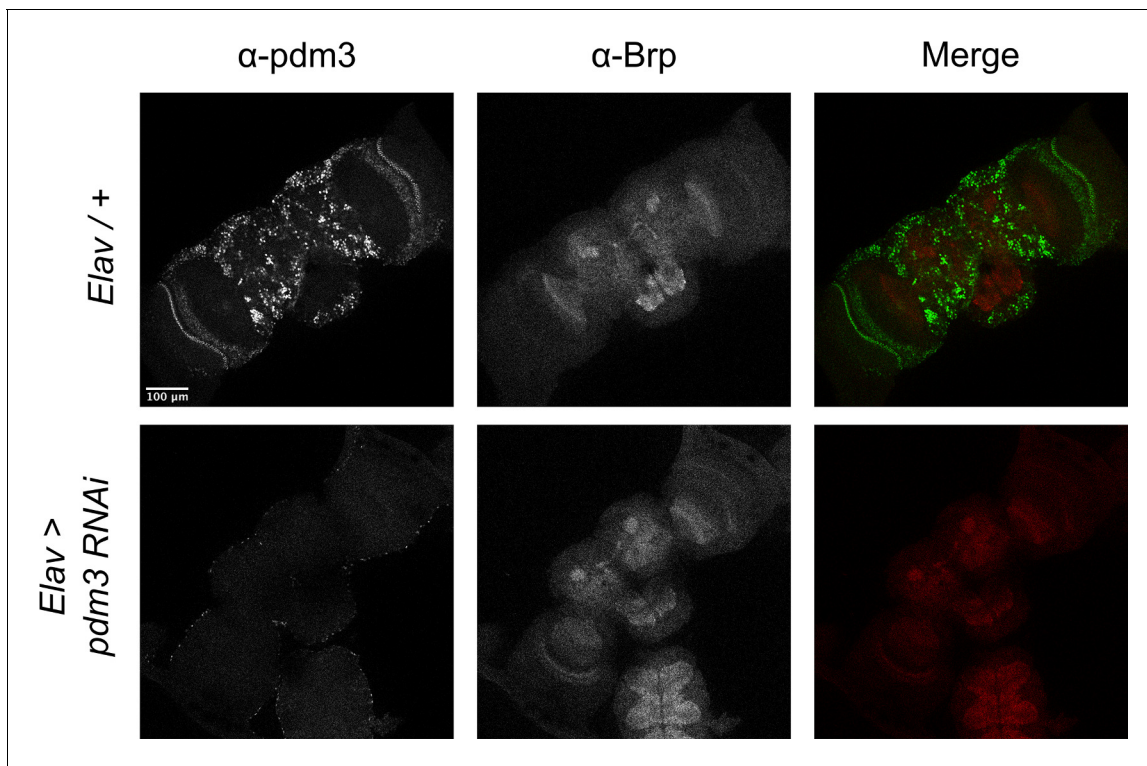

**Figure 8—figure supplement 1.** Confirmation of PDM3 protein reduction at the mid-pupal developmental timepoint used for RNA-Seq experiments.

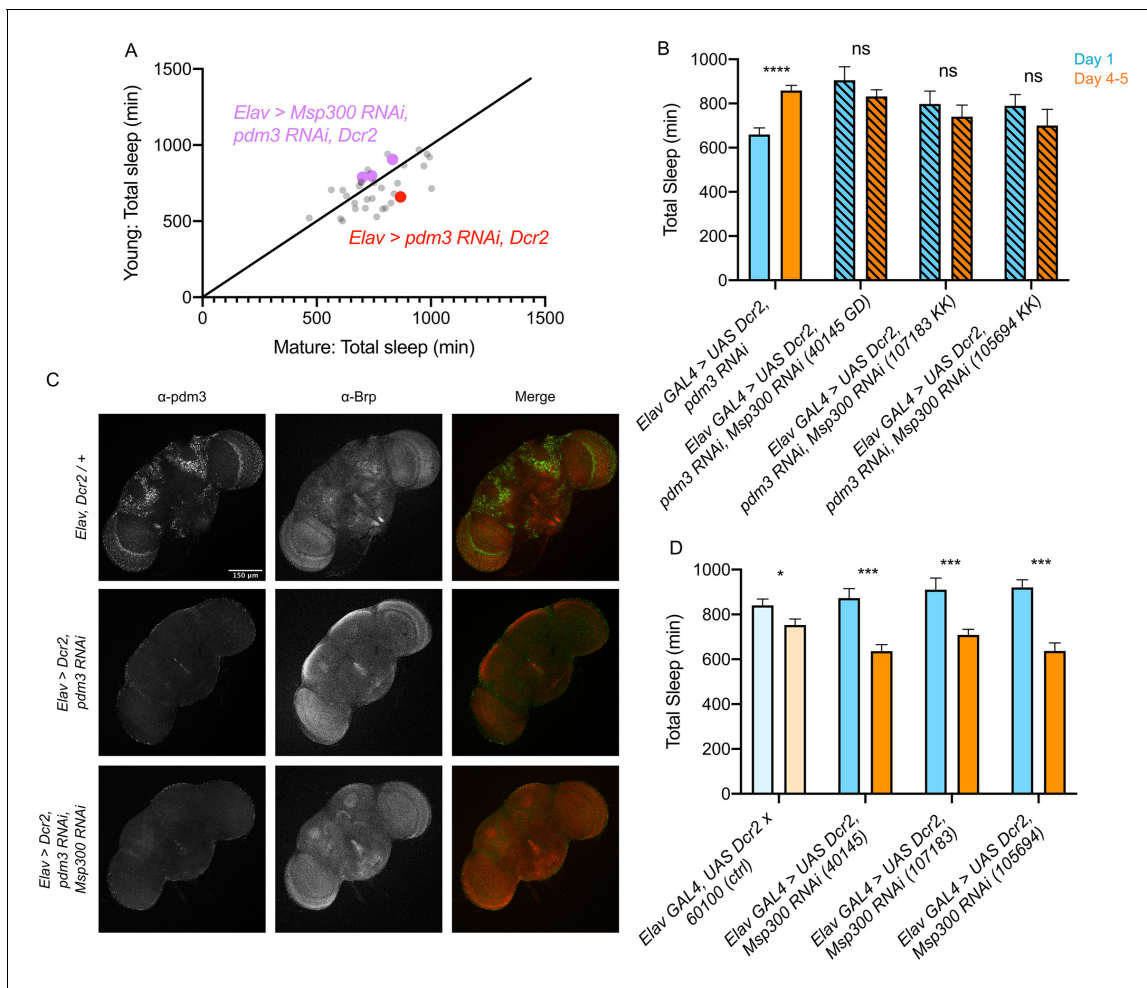

**Figure 8—figure supplement 2.** Additional modifier screen data and further characterization of *Msp300* phenotype. (A) Modifier screen with co-expression of RNAi targeting upregulated genes from RNA-Seq alongside *pdm3* RNAi, plotted as total sleep time in young versus mature flies of each genotype ( $n \geq 16$  per genotype/age). Overlaid identity line represents young = mature total sleep time. (B) Total sleep time in *Elav*-*pdm3* RNAi with co-expression of *Msp300* RNAi ( $n = 32, 40, 14, 38, 14, 42, 26, 24$  left to right). (C) Confirmation of PDM3 protein reduction with co-expression of *Msp300* RNAi line with strongest effect on modifying sleep ontogeny (VDR #105694). (D) Total sleep time with *Elav* > *Msp300* RNAi only ( $n = 14, 27, 10, 24, 12, 24, 12, 24$  left to right). \*\*\*\* $p < 0.0001$ , \*\*\* $p < 0.001$ , \* $p < 0.05$ ; multiple Student's *t* tests with Holm-Sidak correction,  $\alpha = 0.05$  (B,D).

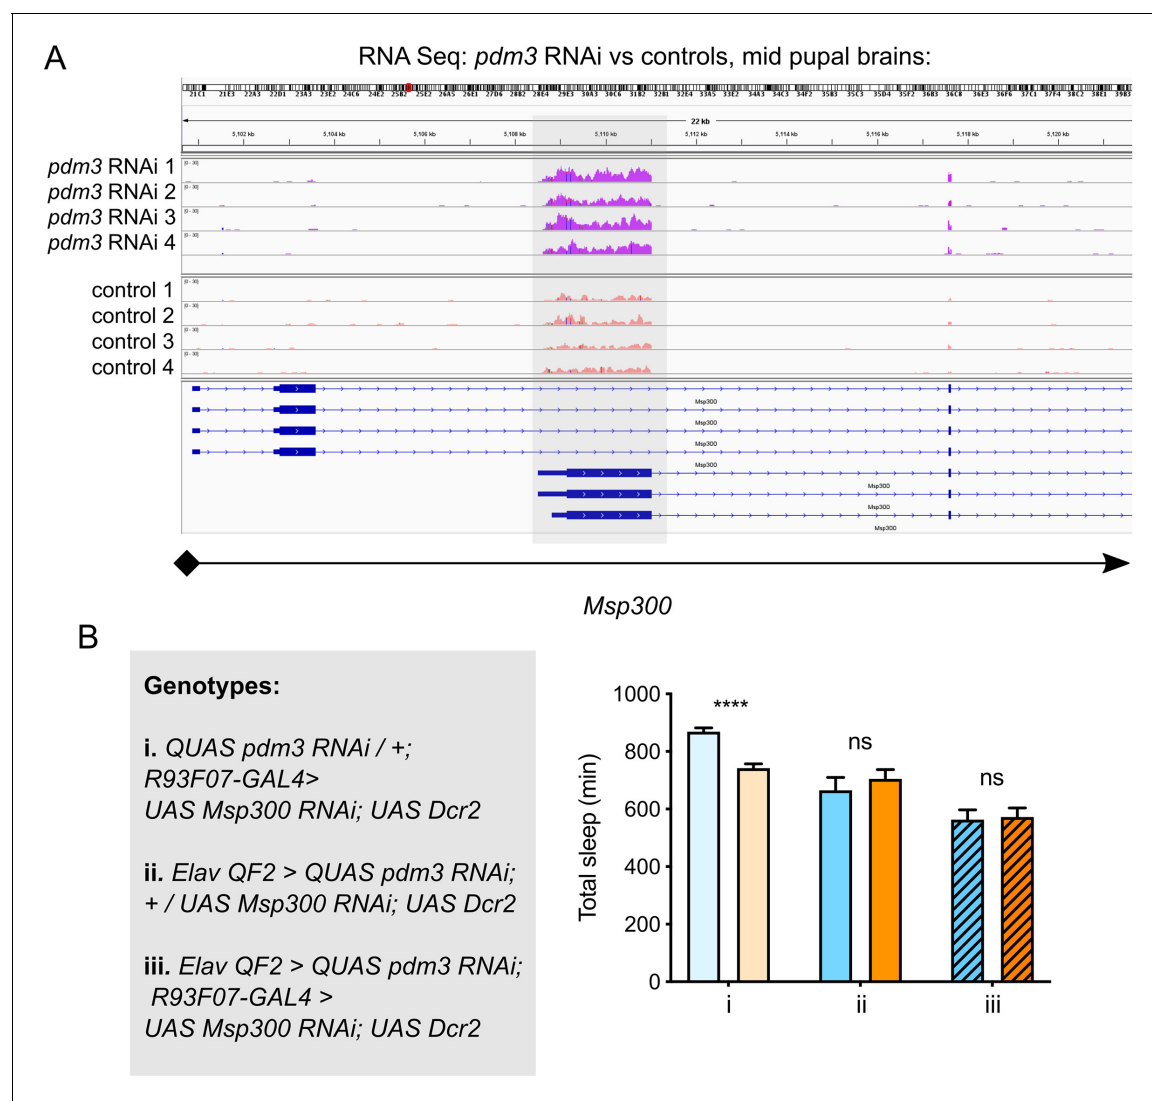

**Figure 8—figure supplement 3.** Molecular and cellular interactions between *Msp300* and *PDM3*. (A) Visualization of reads from RNA-Seq in *pdm3* RNAi (top, dark pink) versus controls (bottom, light pink), indicating a greater read pileup in *pdm3* RNAi in the first exon common to *Msp300* isoforms RD, RL and RB (gray box). (B) *Msp300* knockdown in *R93F07*+ neurons in the setting of pan-neuronal *pdm3* RNAi and controls (n = 90, 52, 31, 49, 56, 53 left to right). \*\*\*\*p<0.0001; multiple Student's t tests with Holm-Sidak correction, alpha = 0.05.
